# Supplementary material for: Efficient peroxymonosulfate activation by microscale CuO coated melamine–cyanuric acid supramolecular assembly toward tetracycline degradation
Source: Royal Society of Chemistry journal article supplement (doi:10.1039/d4nj03683b), 2024-01-01
Supplement: d4nj03683b1.pdf [file d4nj03683b1.pdf]

Efficient peroxymonosulfate activation by microscale CuO coated melamine-  
cyanuric acid supramolecular toward tetracycline degradation

Ziru Shao, Shuangfei Zhang, Yonghong Shi, Deyong Wu\* □

Hubei Key Laboratory of Biologic Resources Protection and Utilization, School of Chemical  
and Environmental Engineering, Hubei Minzu University, Enshi, Hubei Province 445000,  
China

Table S1. Textural properties of as-prepared samples

| Sample     | $S_{\text{BET}}$ ( $\text{m}^2 \text{g}^{-1}$ ) | $V_{\text{BET}}$ ( $\text{cm}^3 \text{g}^{-1}$ ) | Pore size(nm) |
|------------|-------------------------------------------------|--------------------------------------------------|---------------|
| CuO/MCSA-1 | 6.18                                            | 0.023                                            | 15.59         |
| MCSA       | 5.50                                            | 0.014                                            | 11.60         |

Table S2. The proportion of CuO in the CuO/MCSA-1 measured by ICP-MS.

| Sample     | Measured Cu<br>(wt%) | Calculate CuO<br>(wt%) |
|------------|----------------------|------------------------|
| CuO/MCSA-1 | 1.9822               | 2.9733                 |

Table S3. Degradation efficiency and reaction rate constant of different materials

| material                                                                               | degradation efficiency<br>(Contaminant, time) | reaction rate constant( $\text{min}^{-1}$ ) |
|----------------------------------------------------------------------------------------|-----------------------------------------------|---------------------------------------------|
| CuO/MCSA                                                                               | 84.1% (TC, 30min)                             | 0.0612                                      |
| CuO/{010}BiVO <sub>4</sub> <sup>71</sup>                                               | 97.1% (NOR, 60min)                            | 0.0544                                      |
| nAg/nZVI/AC <sup>72</sup>                                                              | 90.1% (Toluene, 120min)                       | 0.0866                                      |
| MoO <sub>3</sub> /g-C <sub>3</sub> N <sub>4</sub> <sup>73</sup>                        | 81.13 % (TC, 75 min)                          | 0.0195                                      |
| ZnIn <sub>2</sub> S <sub>4</sub> /g-C <sub>3</sub> N <sub>4</sub> <sup>74</sup>        | 89.4% (Sulfamethoxazole, 120 min)             | 0.0587                                      |
| g-C <sub>3</sub> N <sub>4</sub> /NiFe <sub>2</sub> O <sub>4</sub><br>/Ag <sup>75</sup> | 92.1% (TC, 120 min)                           | 0.0450                                      |

\* Corresponding author.  
E-mail address: wdy001815@126.com (D. Wu)

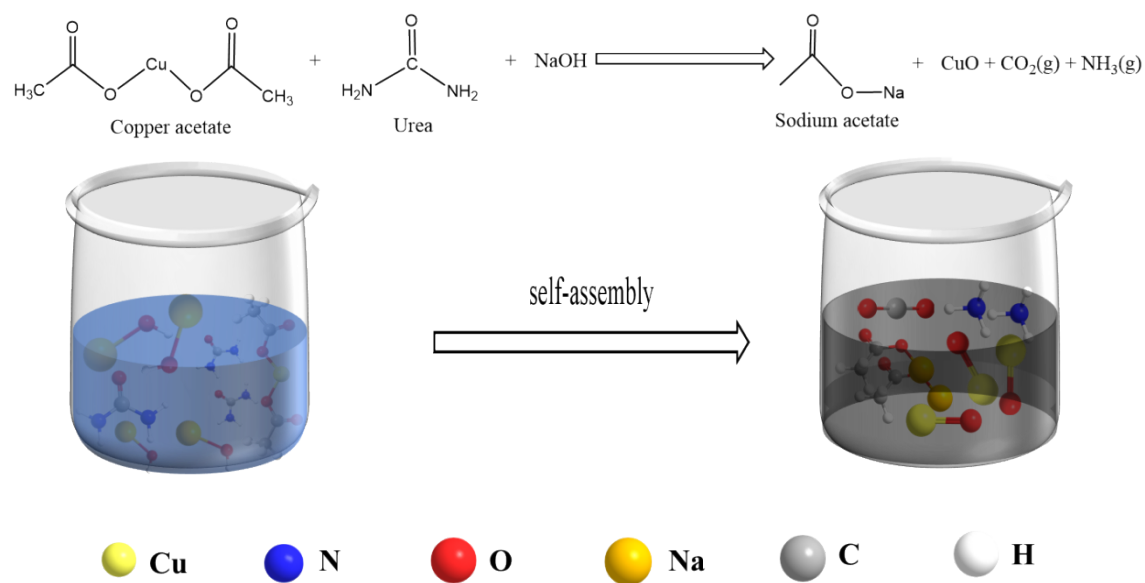

**Fig.S1. Schematic procedure of CuO nanoparticles.**

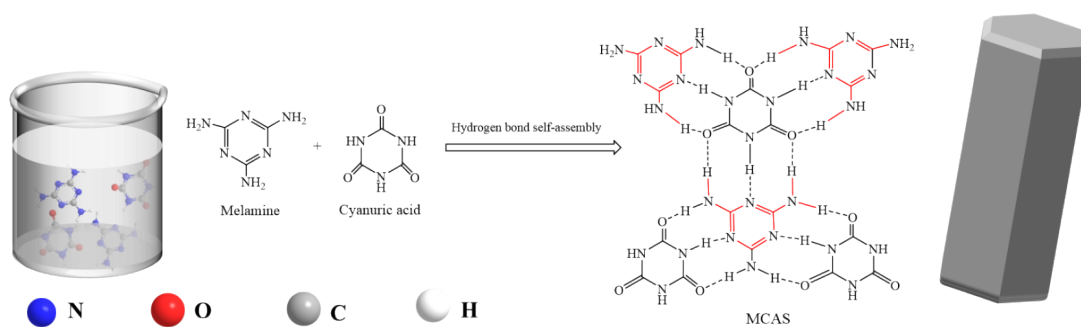

**Fig.S2. Schematic procedure of MCAS.**

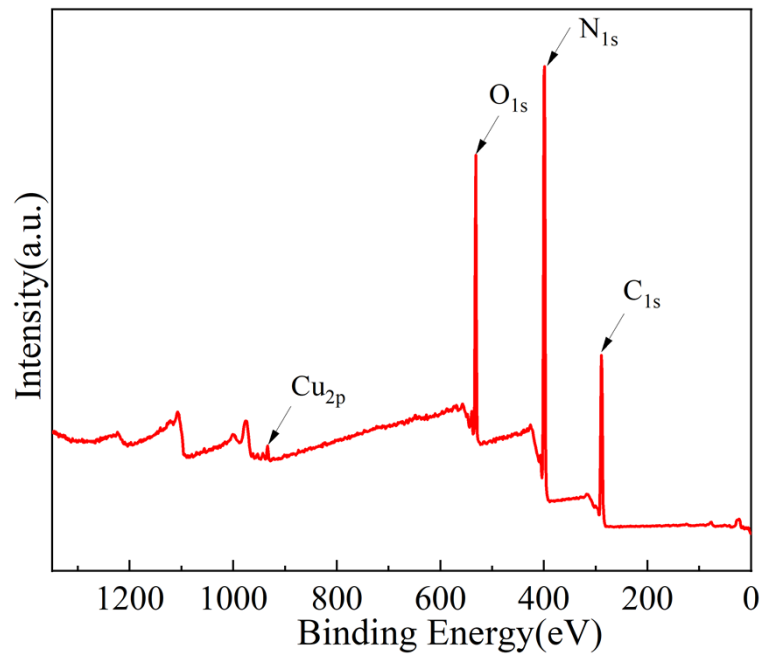

Fig.S3 The survey XPS spectrum of CuO/MCSA-1

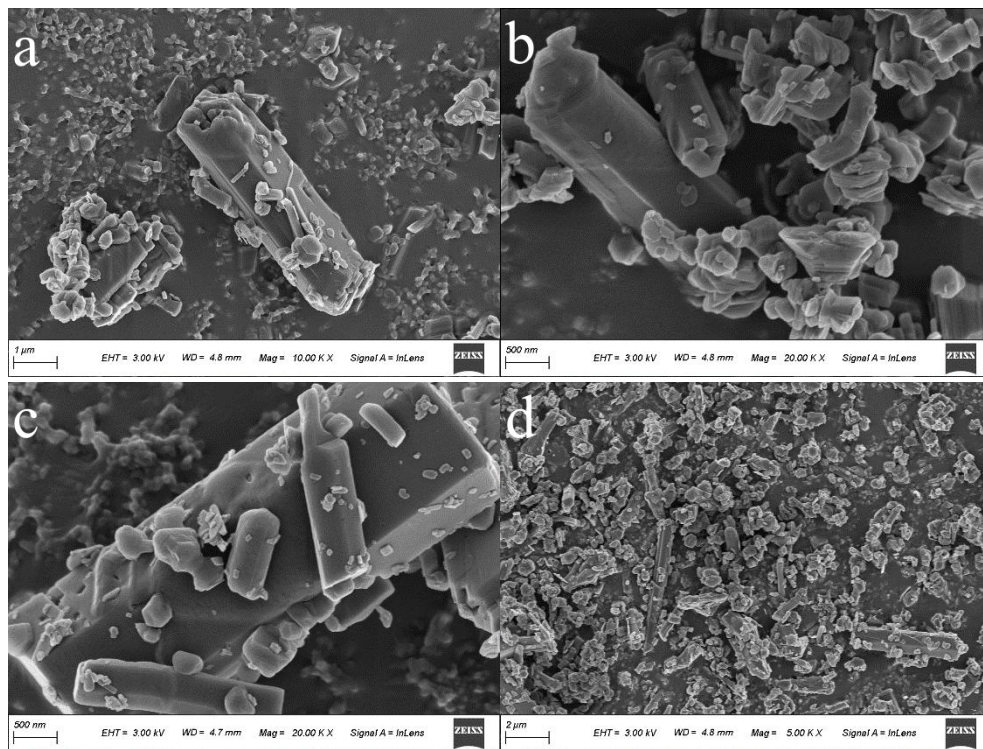

Fig.S4 SEM images of CuO/MCSA-2 (a) CuO/MCSA-3 (b) CuO/MCSA-4 (c) and CuO/MCSA-5 (d).

Fig.S5.TGA diagrams of CuO/MCSA-1.

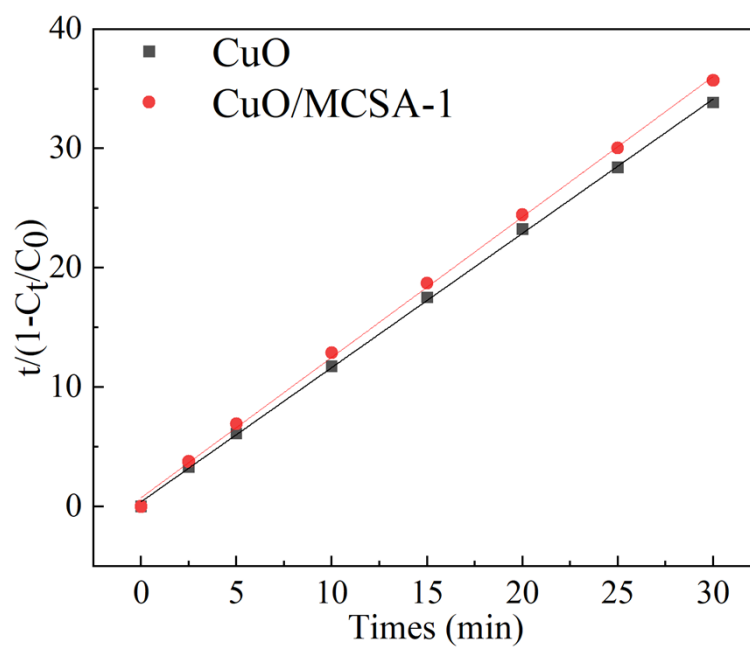

Fig.S6 The kinetic models of TC degradation by CuO/PMS system and CuO/MCSA-1/PMS system.

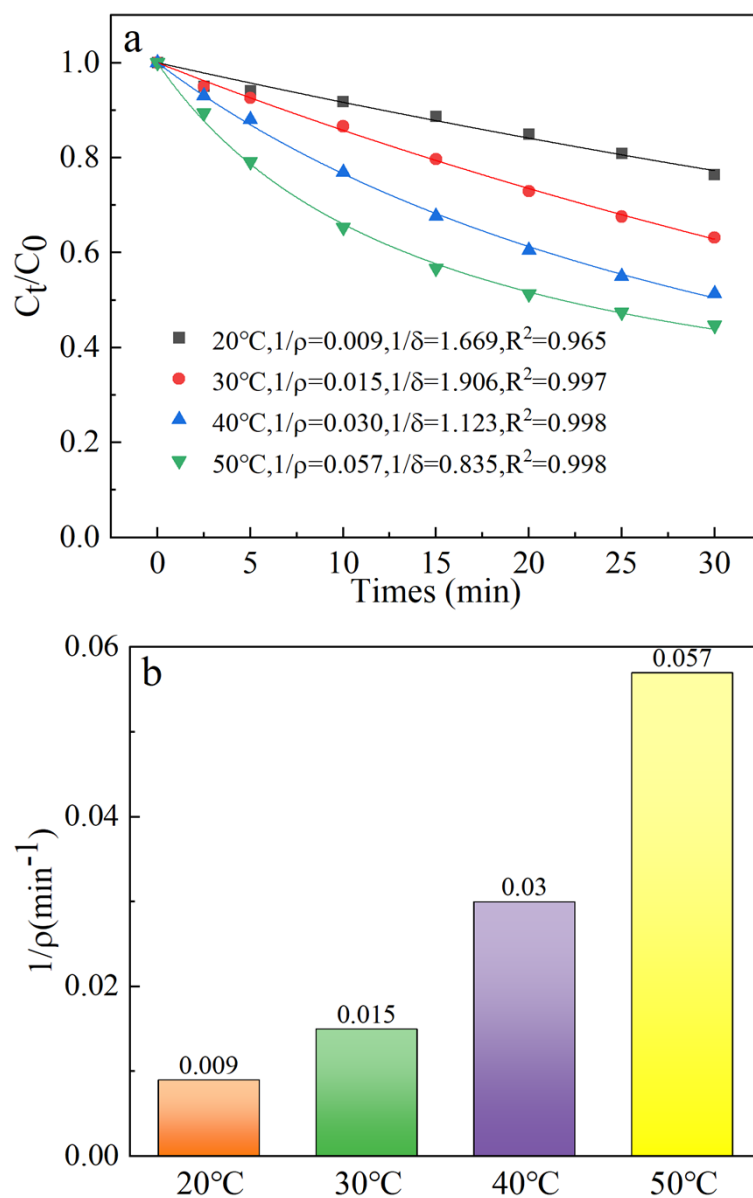

Fig.S7 Fitting curves of TC degradation by PMS self under different temperature (a), and the corresponding initial degradation rates (b).

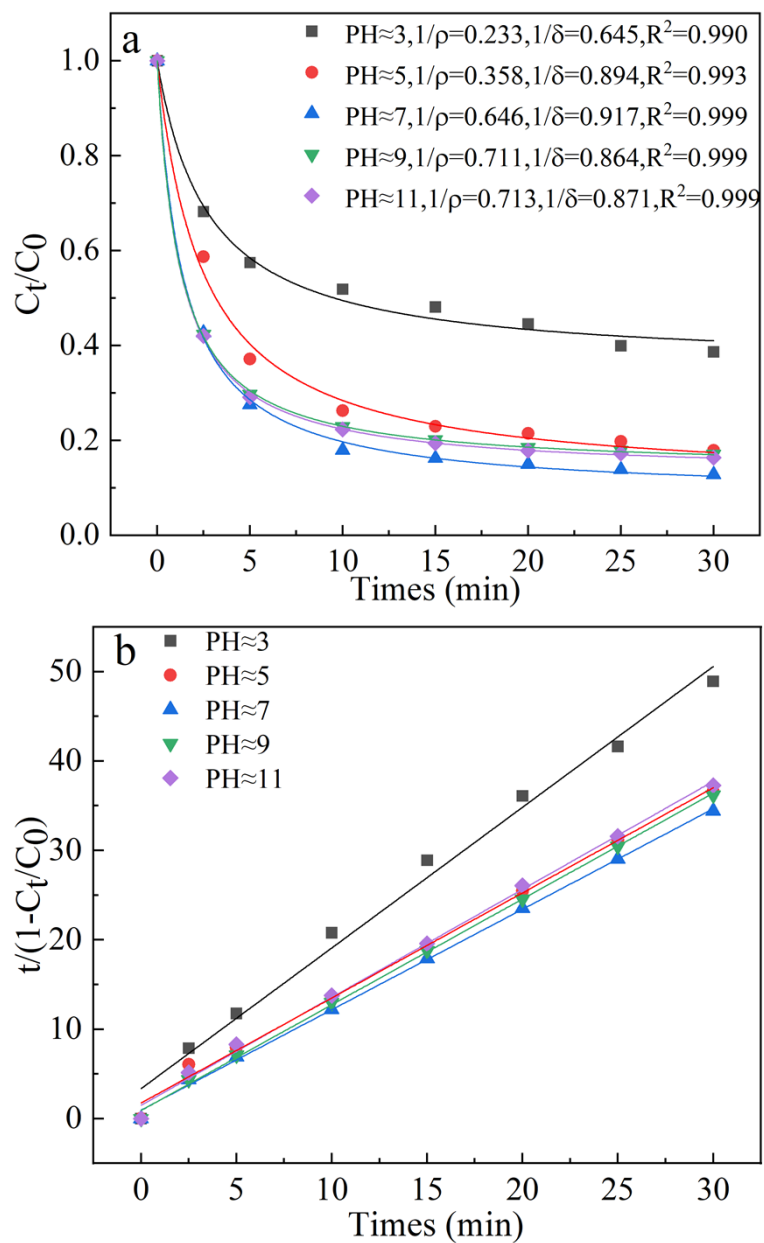

Fig.S8 Fitting curves of TC degradation by CuO/MCSA-1 under different pH values (a), and the corresponding kinetic models (b).

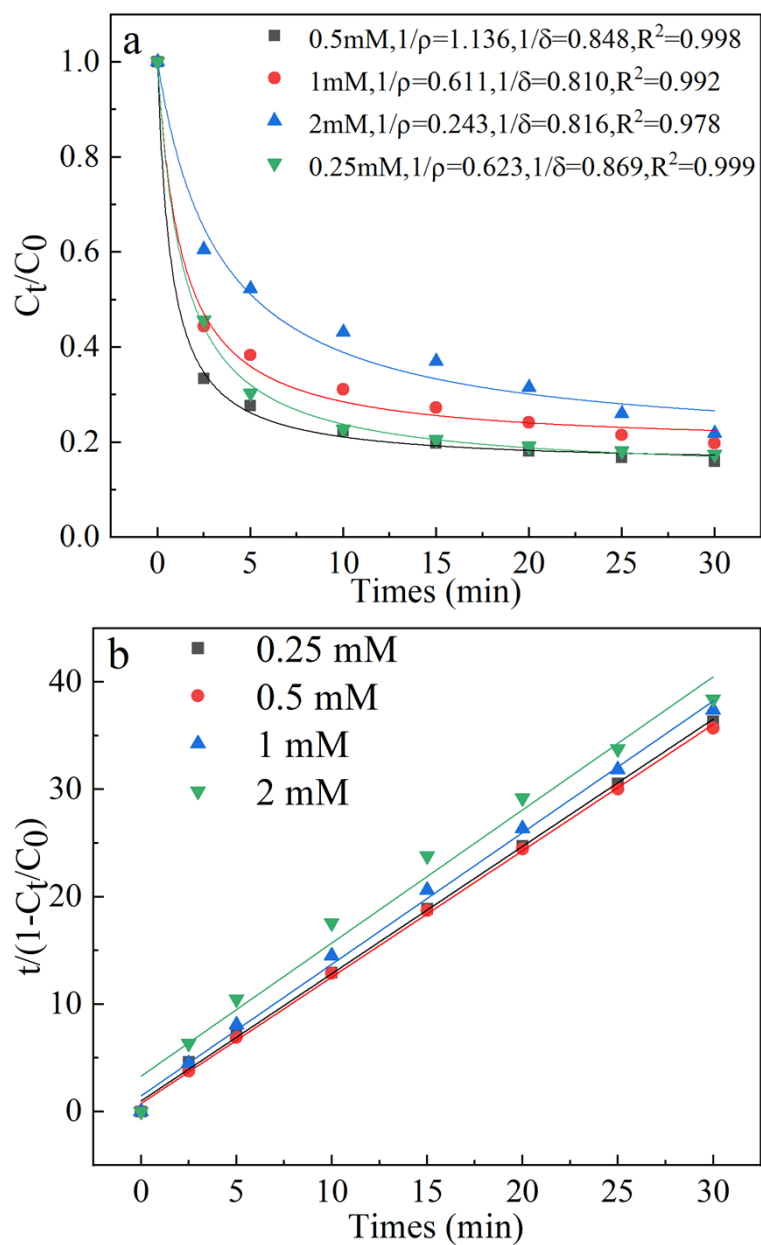

Fig.S9 Fitting curves of TC degradation by CuO/MCSA-1 with different PMS concentration (a), and the corresponding kinetic models (b).

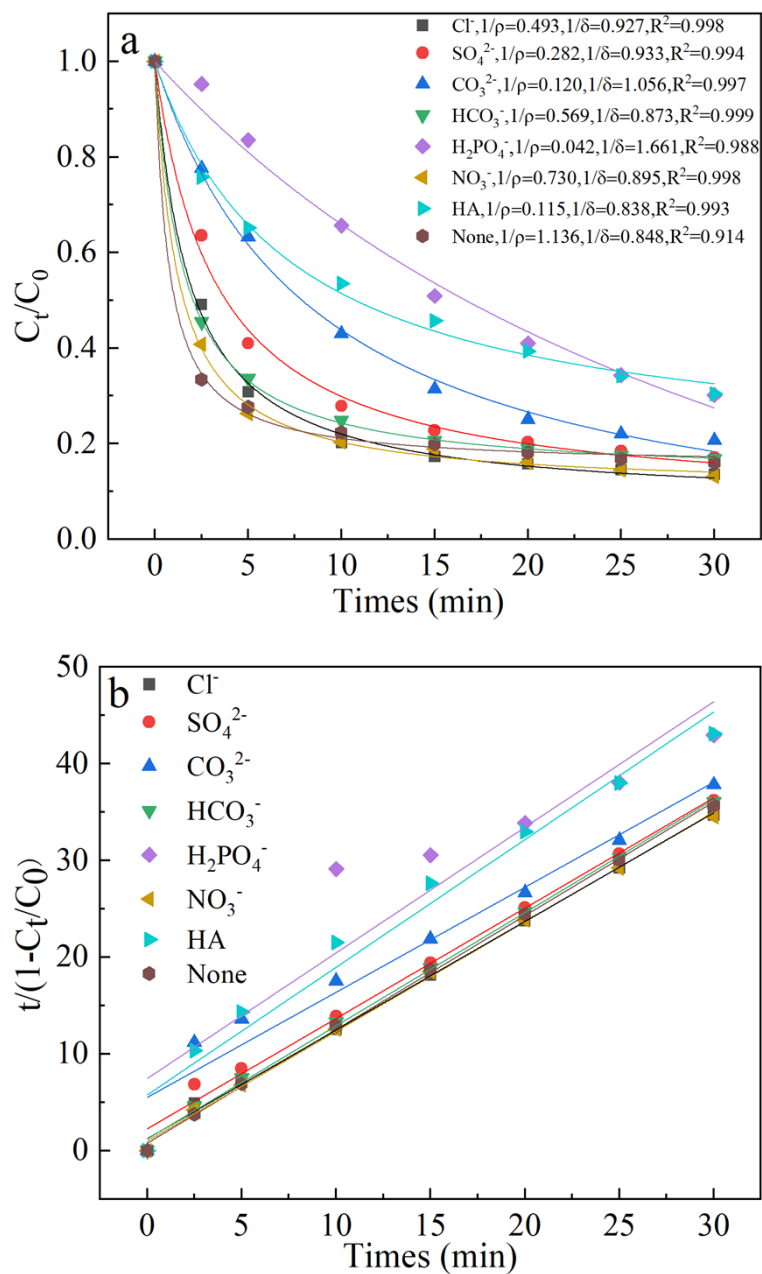

Fig.S10 Fitting curves of TC degradation by CuO/MCSA-1 after adding 2mM anion or HA (a), and the corresponding kinetic models (b).



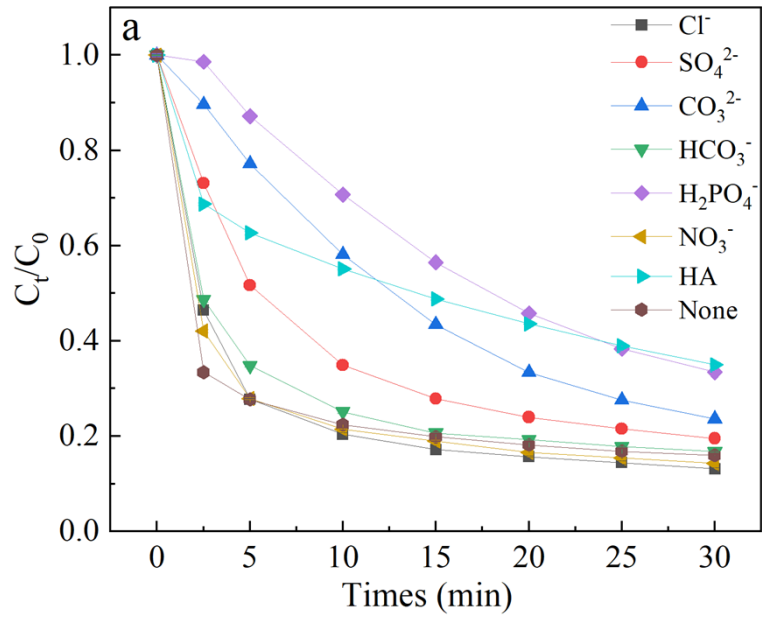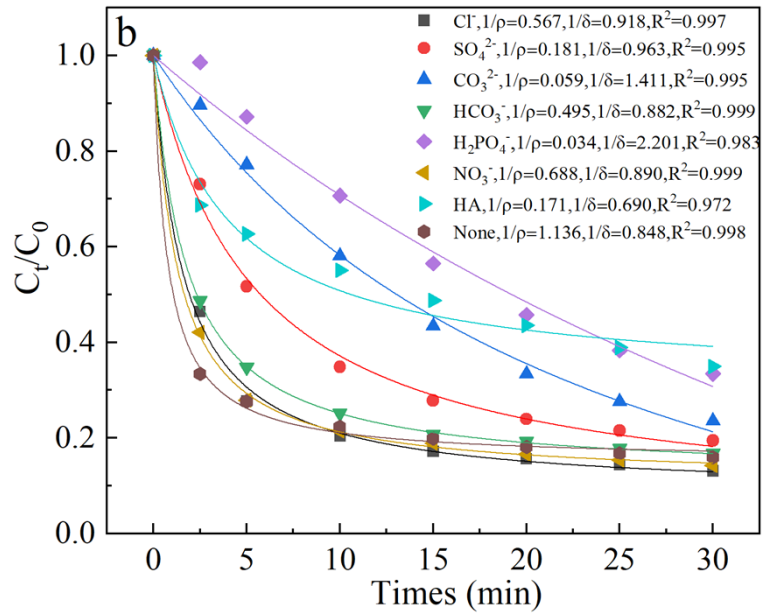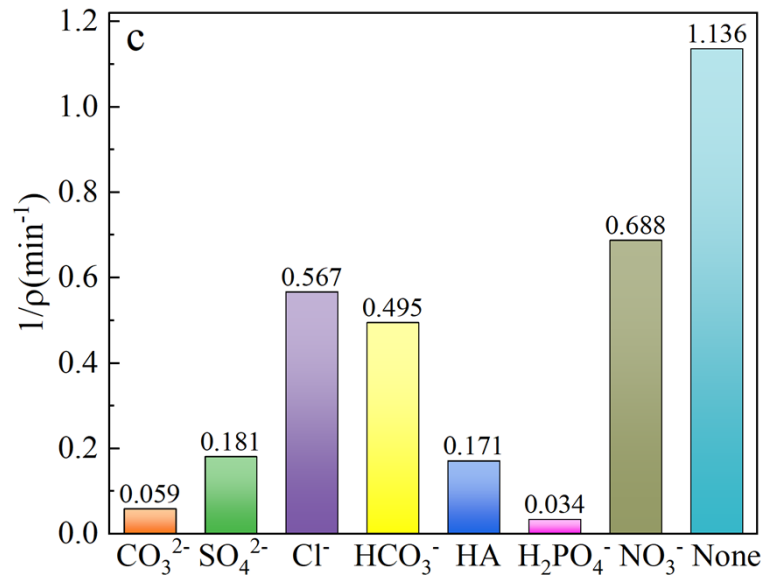

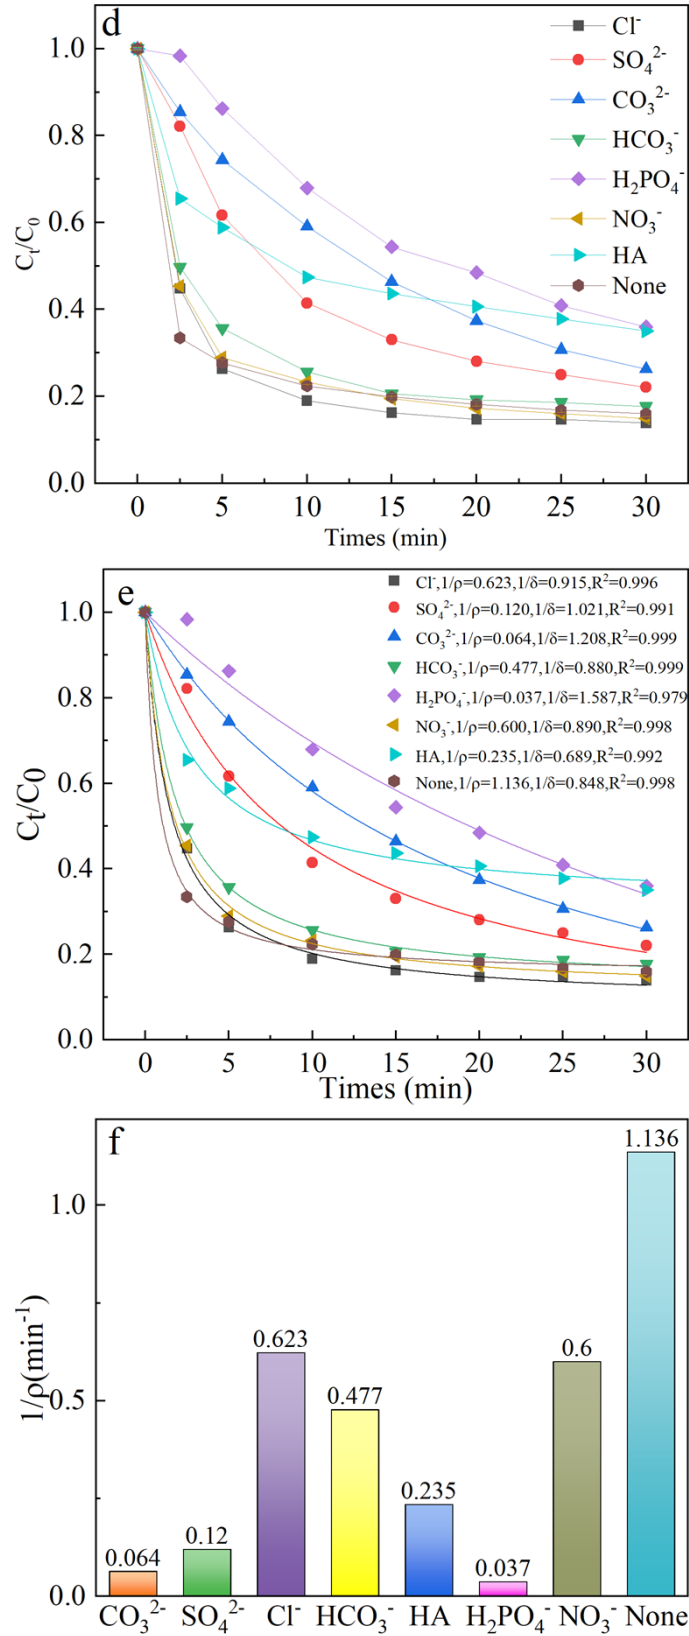

Fig.S11 TC degradation by CuO/MCSA-1 after adding 4 mM or 8 mM anion or HA (a, d), the corresponding fitting curves (b, e) and the corresponding initial degradation rate constants (c, f).

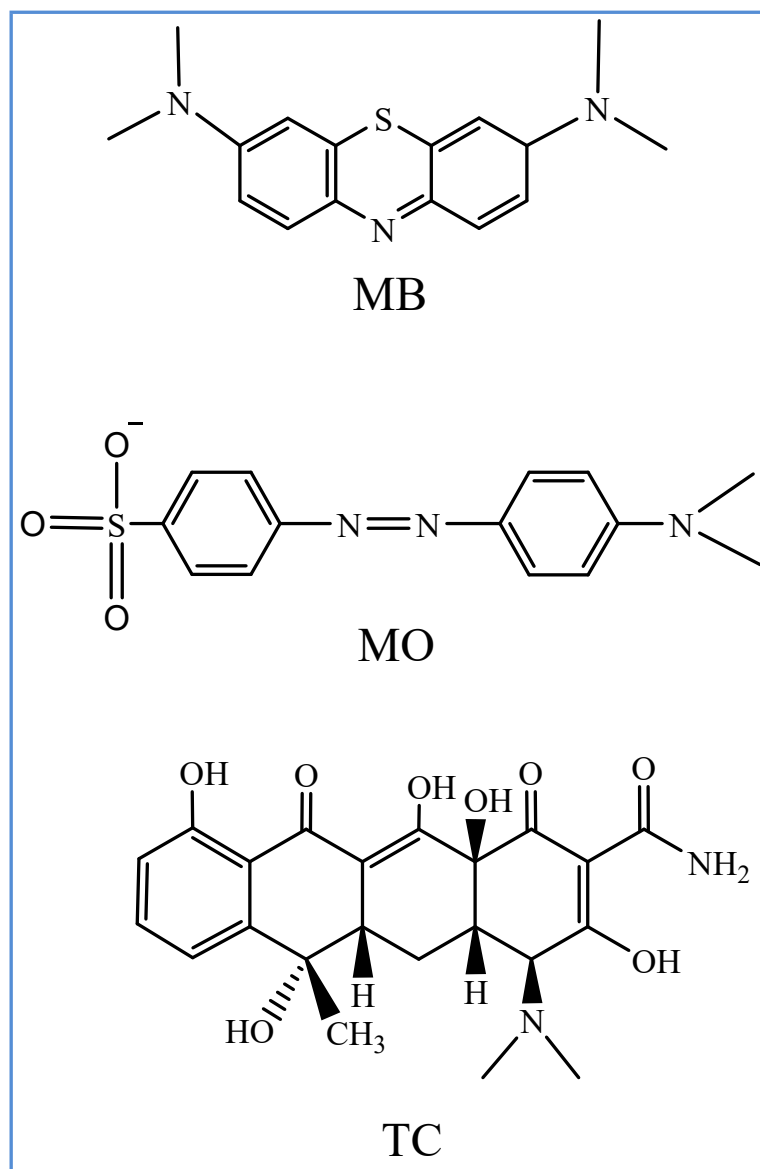

Fig.S12 the Structural formulas for corresponding organic pollutants

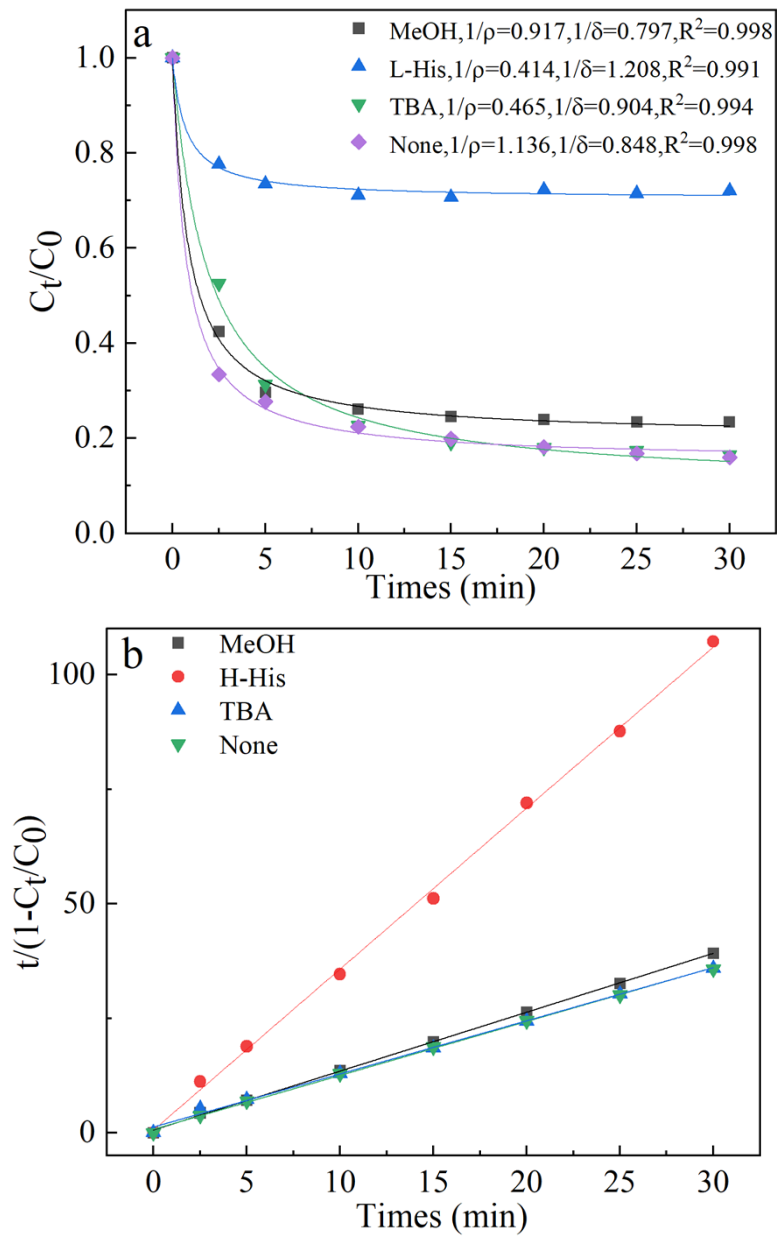

Fig.S13 Fitting curves of TC degradation by CuO/MCSA-1 after adding various scavengers

(a), and the corresponding kinetic models (b).

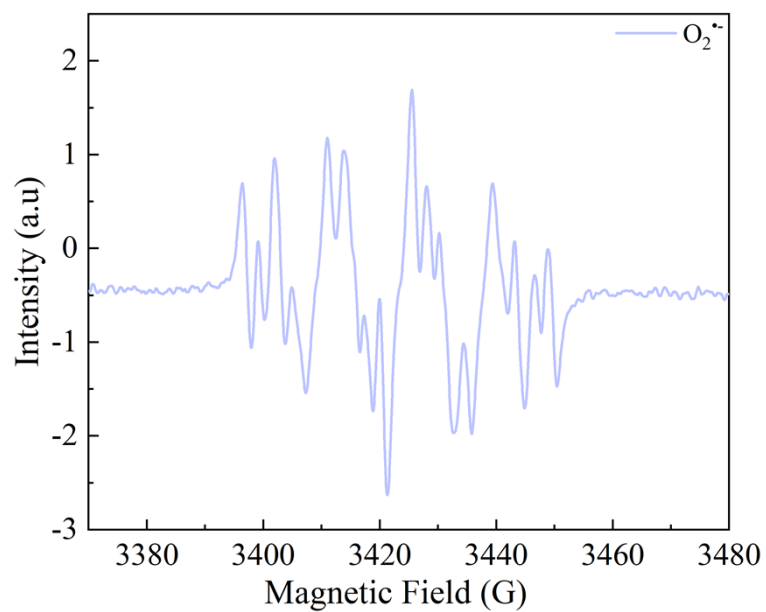

Fig.S14 EPR spectrum of  $O_2^{\bullet-}$ .

Fig.S15 Stability tests of CuO/MCSA over five consecutive cycles.
